# Supplementary material for: Co-sensitization promoted light harvesting with a new mixed-addenda polyoxometalate [Cu(C12H8N2)2]2[V2W4O19]·4H2O in dye-sensitized solar cells
Source: Royal Society of Chemistry journal article supplement (doi:10.1039/c5dt02992a), 2015-01-01
Supplement: c5dt02992a1.pdf [file c5dt02992a1.pdf]

## Supporting Information

### **Co-sensitization Promoted Light Harvesting with a New Mixed-Addenda Polyoxometalate $[\text{Cu}(\text{C}_{12}\text{H}_8\text{N}_2)_2]_2[\text{V}_2\text{W}_4\text{O}_{19}] \cdot 4\text{H}_2\text{O}$ in Dye-Sensitized Solar Cells**

Sha-Sha Xu,<sup>a</sup> Wei-Lin Chen,<sup>\*a</sup> Yan-Hua Wang,<sup>a</sup> Yang-Guang Li,<sup>a</sup> Zhu-Jun Liu,<sup>a</sup> Chun-Hui Shan,<sup>a</sup> Zhong-Min Su<sup>a</sup> and En-Bo Wang<sup>\*a</sup>

<sup>a</sup>Key laboratory of Polyoxometalate Science of Ministry of Education, Department of Chemistry, Northeast Normal University, Renmin Street No.5268, Changchun, Jilin, 130024, P. R. China. E-mail: chenwl@nenu.edu.cn (W. L. Chen), wangeb889@nenu.edu.cn (E. B. Wang), Tel: +86-431-85098787.

**Table S1** Bond Valence Sums

| bond      | bond -length | bond-dist | [exp[(r <sub>0</sub> -r)/B] | BVS=Σexp[(r <sub>0</sub> - r) /B] |
|-----------|--------------|-----------|-----------------------------|-----------------------------------|
| W(1)-O(2) | 1.91         | 1.96      | 0.873                       |                                   |
| W(1)-O(3) | 1.91         | 2.296     | 0.351                       |                                   |
| W(1)-     | 1.91         | 1.875     | 1.099                       | 6.259                             |
| W(1)-O(7) | 1.91         | 1.974     | 0.841                       |                                   |
| W(1)-O(8) | 1.91         | 1.661     | 1.960                       |                                   |
| W(1)-O(9) | 1.91         | 1.863     | 1.135                       |                                   |

| bond        | bond -length | bond-dist | [exp[(r <sub>0</sub> -r)/B] | BVS=Σexp[(r <sub>0</sub> - r) /B] |
|-------------|--------------|-----------|-----------------------------|-----------------------------------|
| W(2)-O(1)   | 1.91         | 1.894     | 1.044                       |                                   |
| W(2)-O(3)   | 1.91         | 2.314     | 0.335                       |                                   |
| W(2)-O(4)#1 | 1.91         | 1.928     | 0.952                       | 6.252                             |
| W(2)-O(7)#1 | 1.91         | 1.956     | 0.883                       |                                   |
| W(2)-O(9)   | 1.91         | 1.895     | 1.041                       |                                   |
| W(2)-O(10)  | 1.91         | 1.654     | 1.997                       |                                   |

| bond      | bond -length | bond-dist | [exp[(r <sub>0</sub> -r)/B] | BVS=Σexp[(r <sub>0</sub> - r) /B] |
|-----------|--------------|-----------|-----------------------------|-----------------------------------|
| W(3)-O(1) | 1.91         | 1.917     | 0.981                       |                                   |
| W(3)-O(2) | 1.91         | 1.886     | 1.067                       |                                   |
| W(3)-O(3) | 1.91         | 2.285     | 0.363                       | 6.051                             |
| W(3)-O(4) | 1.91         | 1.889     | 1.058                       |                                   |
| W(3)-O(5) | 1.91         | 1.943     | 0.915                       |                                   |
| W(3)-O(6) | 1.91         | 1.721     | 1.667                       |                                   |

| bond        | bond -length | bond-dist | [exp[(r <sub>0</sub> -r)/B] | BVS=Σexp[(r <sub>0</sub> - r) /B] |
|-------------|--------------|-----------|-----------------------------|-----------------------------------|
| V(1)-O(2)   | 1.803        | 1.96      | 0.65                        |                                   |
| V(1)-O(3)   | 1.803        | 2.296     | 0.263                       |                                   |
| V(1)-O(5)#1 | 1.803        | 1.875     | 0.823                       | 4.689                             |
| V(1)-O(7)   | 1.803        | 1.974     | 0.630                       |                                   |
| V(1)-O(8)   | 1.803        | 1.661     | 1.468                       |                                   |
| V(1)-O(9)   | 1.803        | 1.863     | 0.850                       |                                   |

| bond        | bond -length | bond-dist | [exp[(r <sub>0</sub> -r)/B] | BVS=Σexp[(r <sub>0</sub> - r) /B] |
|-------------|--------------|-----------|-----------------------------|-----------------------------------|
| V(2)-O(1)   | 1.803        | 1.894     | 0.782                       |                                   |
| V(2)-O(3)   | 1.803        | 2.314     | 0.251                       |                                   |
| V(2)-O(4)#1 | 1.803        | 1.928     | 0.713                       | 4.683                             |
| V(2)-O(7)#1 | 1.803        | 1.956     | 0.661                       |                                   |
| V(2)-O(9)   | 1.803        | 1.895     | 0.780                       |                                   |
| V(2)-O(10)  | 1.803        | 1.654     | 1.496                       |                                   |

| bond       | bond -length | bond-dist | $[\exp[(r_0-r)/B]]$ | $BVS=\sum\exp[(r_0 - r) /B]$ |
|------------|--------------|-----------|---------------------|------------------------------|
| Cu(1)-N(1) | 1.763        | 2.115     | 0.386               |                              |
| Cu(1)-N(2) | 1.763        | 1.977     | 0.561               |                              |
| Cu(1)-N(3) | 1.763        | 2.088     | 0.415               | 2.339                        |
| Cu(1)-N(4) | 1.763        | 1.960     | 0.587               |                              |
| Cu(1)-O(7) | 1.679        | 2.027     | 0.390               |                              |

Symmetry transformations used to generate equivalent atoms: #1 -x+1/2,-y+1/2,-z+1

**Table S2** Comparison of M-O average bond distances of compound **1** with those in reported cluster anions.

| anion                                                          | M-O <sub>c</sub> (Å) | M-O <sub>b</sub> (Å) | M-O <sub>t</sub> (Å) |
|----------------------------------------------------------------|----------------------|----------------------|----------------------|
| [W <sub>6</sub> O <sub>19</sub> ] <sup>2-</sup>                | 2.331                | 1.922                | 1.694                |
| [V <sub>2</sub> W <sub>4</sub> O <sub>19</sub> ] <sup>4-</sup> | 2.305                | 1.922                | 1.695                |
| <b>1</b>                                                       | 2.299                | 1.915                | 1.679                |

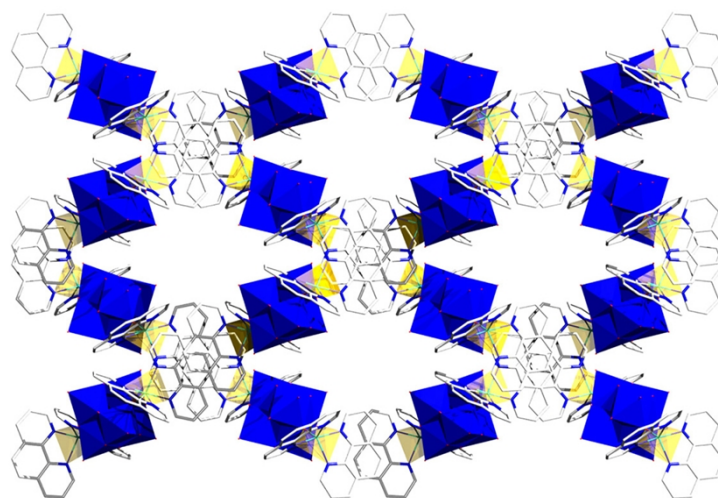

**Fig. S1** Packing arrangement of **1** viewed along c axis. The polyanions are represented with polyhedra: {CuON<sub>4</sub>}, yellow polyhedron; {W(V)O<sub>6</sub>}, blue octahedron; C (grey) and N (blue) ions are shown with thick sticks.

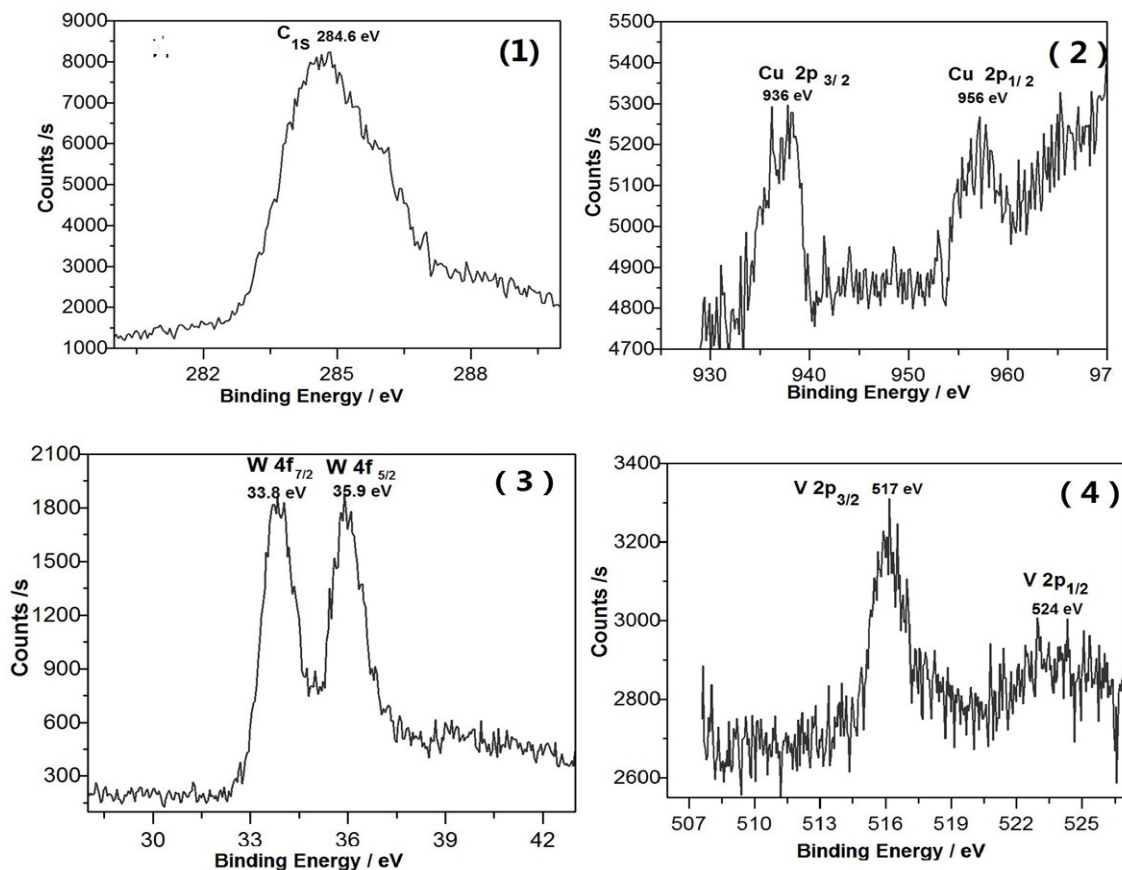

Fig. S2 The XPS spectra of C1s(1), Cu2p(2), W4f(3), V2p(4)

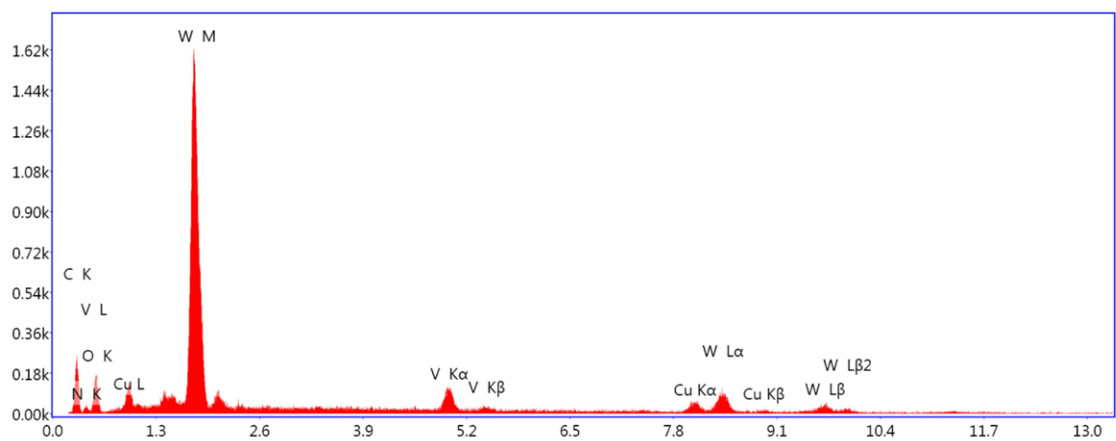

Fig. S3 The EDX diagram of 1

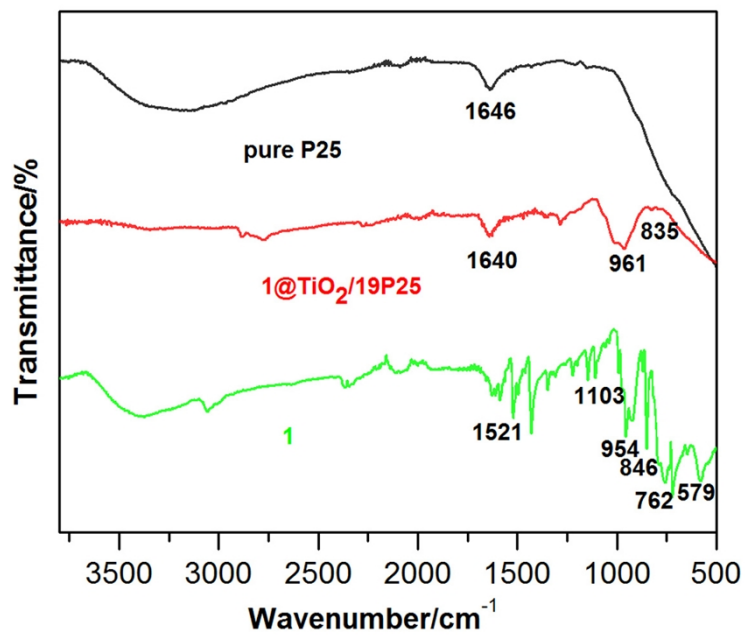

**Fig. S4** The FT-IR spectra of **1**(green), **1@TiO<sub>2</sub>/19P25**(red) and pure P25(black)

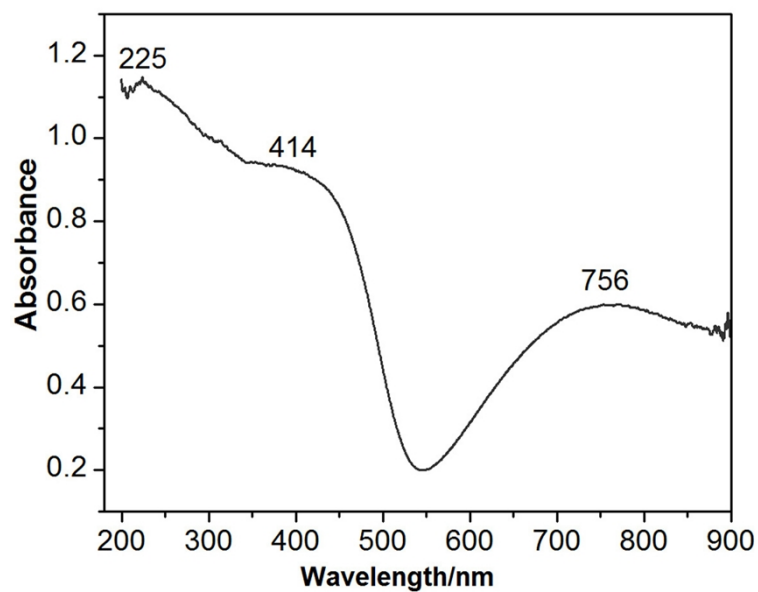

**Fig. S5** The UV-Vis spectrum of **1**

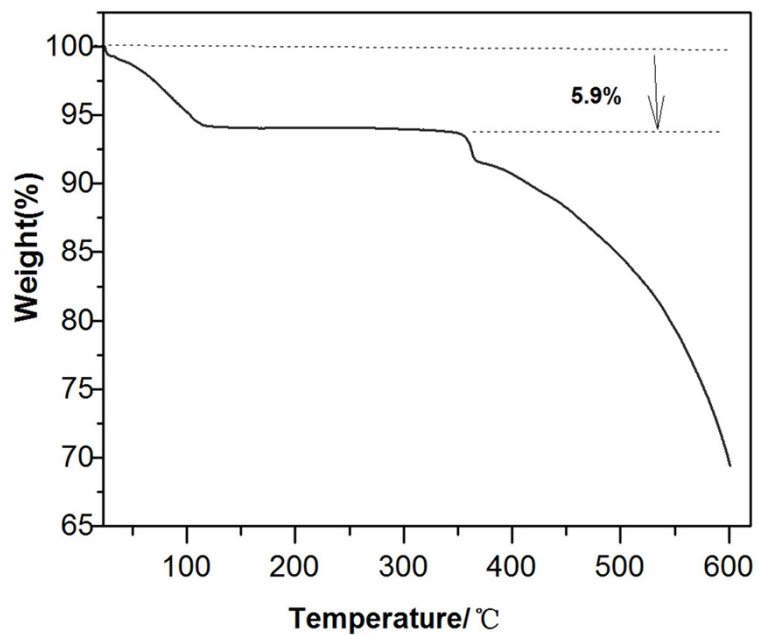

**Fig. S6** Thermogravimetric analysis (TGA) curve of **1**

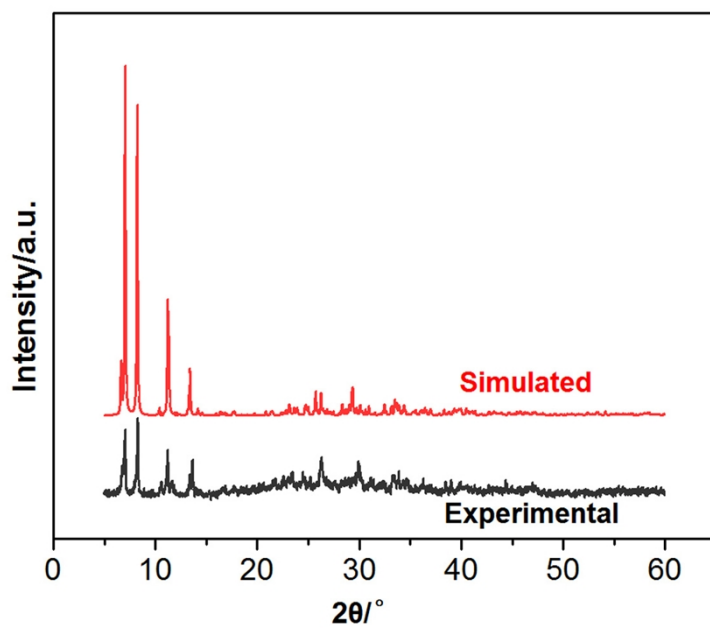

**Fig. S7** The simulated and measured XRD patterns of **1**

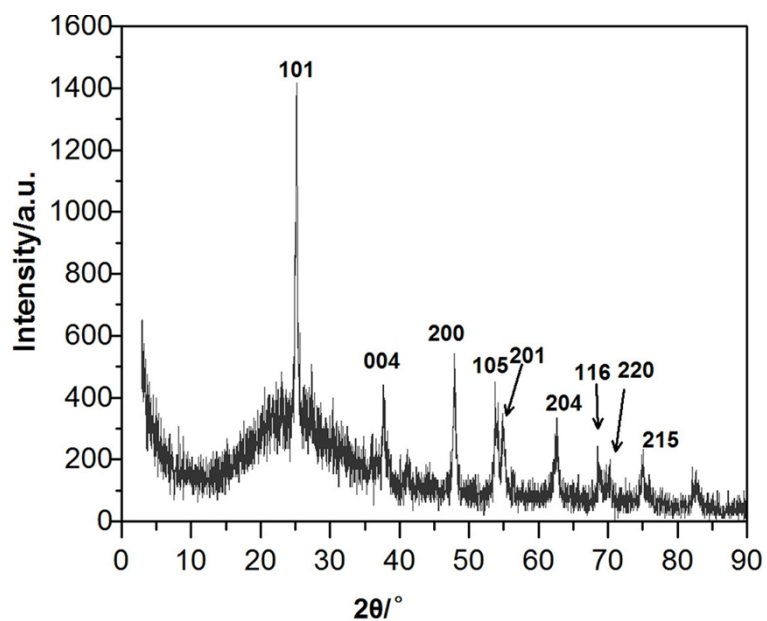

**Fig. S8** XRD pattern of the 1@TiO<sub>2</sub>/19P25 composite

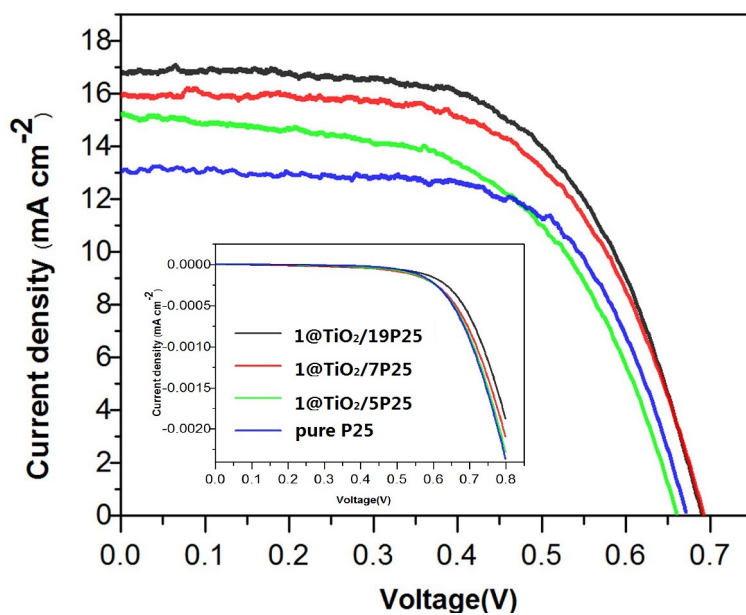

**Fig. S9** The current voltage curves of DSSCs with 1@TiO<sub>2</sub>/nP25 (n=5, 7, 19) and pure P25 electrode under AM 1.5 radiation (100 mW cm<sup>-2</sup>). The inset is the current voltage curves under dark condition.

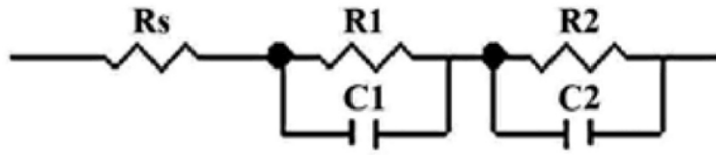

**Fig. S10** Equivalent circuit used to fit the impedance measurements on the DSSCs

**Table S3** Fitted parameters and electron lifetime calculated from  $f_{max}$

| Sample | $R_s(\Omega)$ | $R_1(\Omega)$ | $R_2(\Omega)$ | $f_{max}(\text{Hz})$ | $\tau_e(\text{ms})$ |
|--------|---------------|---------------|---------------|----------------------|---------------------|
| N719   | 33.2          | 37.9          | 5.83          | 56.3                 | 2.83                |
| 1/N719 | 27.1          | 34.9          | 5.17          | 27.7                 | 5.75                |

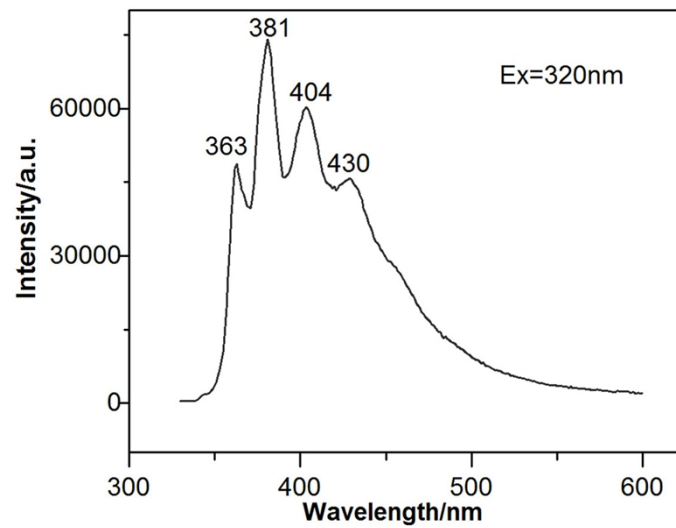

**Fig. S11** The emission spectrum ( $E_x = 320 \text{ nm}$ ) of the phen



**Table S4** Selected bond lengths (Å) and bond angles (°) of **1**

|                  |           |                  |           |
|------------------|-----------|------------------|-----------|
| W(1)/V(1)-O(2)   | 1.961     | W(3) -O(1)       | 1.917     |
| W(1)/V(1)-O(3)   | 2.296     | W(3)-O(2)        | 1.886     |
| W(1)/V(1)-O(5)#1 | 1.875     | W(3) -O(3)       | 2.285     |
| W(1)/V(1)-O(7)   | 1.974     | W(3) -O(4)       | 1.889     |
| W(1)/V(1)-O(8)   | 1.661     | W(3) -O(5)       | 1.943     |
| W(1)/V(1)-O(9)   | 1.863     | W(3) -O(6)       | 1.721     |
| W(2)/V(2)-O(1)   | 1.894     | Cu(1)-N(1)       | 2.115     |
| W(2)/V(2)-O(3)   | 2.314     | Cu(1)-N(2)       | 1.977     |
| W(2)/V(2)-O(4)#1 | 1.928     | Cu(1)-N(3)       | 2.088     |
| W(2)/V(2)-O(7)#1 | 1.956     | Cu(1)-N(4)       | 1.960     |
| W(2)/V(2)-O(9)   | 1.895     | Cu(1)-O(7)       | 2.027     |
| W(2)/V(2)-O(10)  | 1.654     |                  |           |
| N(1)-C(1)        | 1.332(18) | N(2)-C(12)       | 1.315(19) |
| N(1)-C(5)        | 1.369(18) | N(2)-C(7)        | 1.361(19) |
| N(3)-C(13)       | 1.323(18) | N(4)-C(24)       | 1.341(17) |
| N(3)-C(17)       | 1.364(18) | N(4)-C(18)       | 1.380(17) |
| O(8)-W(1)-O(2)   | 102.9(4)  | O(1)-W(2)-O(3)   | 76.3(3)   |
| O(8)-W(1)-O(3)   | 177.0(4)  | O(1)-W(2)-O(4)#1 | 152.1(4)  |
| O(8)-W(1)-O(7)   | 100.5(4)  | O(1)-W(2)-O(7)#1 | 87.4(4)   |
| O(8)-W(1)-O(9)   | 105.1(4)  | O(1)-W(2)-O(9)   | 87.7(4)   |
| O(8)-W(1)-W(2)   | 136.8(4)  | O(1)-W(2)-W(1)   | 82.0(3)   |
| O(7)-Cu(1)-N(3)  | 133.8(4)  | O(7)-Cu(1)-N(1)  | 114.3(4)  |
| N(2)-Cu(1)-O(7)  | 91.8(4)   | N(4)-Cu(1)-O(9)  | 94.6(4)   |
| N(2)-Cu(1)-N(1)  | 81.3(5)   | N(4)-Cu(1)-N(2)  | 173.6(5)  |
| N(2)-Cu(1)-N(3)  | 93.7(5)   | N(4)-Cu(1)-N(3)  | 81.9(5)   |

Symmetry transformations used to generate equivalent atoms: #1 -x+1/2,-y+1/2,-

z+1.
